# Supplementary material for: What Tweets and YouTube comments have in common? Sentiment and graph analysis on data related to US elections 2020
Source: PubMed Central journal article supplement (PMC9888715; doi:10.1371/journal.pone.0270542), 2023-01-31
Supplement: pone.0270542.s001.pdf [file pone.0270542.s001.pdf]

## 7 List of all Hashtags

In this Section, we list of the most popular retrieved hashtags on which we based our dataset along with the tweets count within which they were contained, in Table 5.

6.

**Table 5.** The list of 20 most popular hashtags in our dataset. The entire list of hashtags contain 585.486 unique entries.

| Hashtag                | Tweets count |
|------------------------|--------------|
| #vote                  | 7.196.981    |
| #trump2020             | 3.913.969    |
| #election2020          | 3.535.323    |
| #biden                 | 1.569.981    |
| #trump                 | 959.048      |
| #bidenharris2020       | 866.120      |
| #debate2020            | 855.543      |
| #votebluetosaveamerica | 837.089      |
| #maga                  | 697.381      |
| #trumphascovid         | 581.456      |
| #donaldtrump           | 555.251      |
| #electionday           | 530.188      |
| #covid19               | 394.538      |
| #2020election          | 370.900      |
| #voteearly             | 316.226      |
| #bluewave2020          | 307.853      |
| #kag                   | 295.178      |
| #elections2020         | 270.224      |
| #vote2020              | 261.161      |
| #electionnight         | 255.496      |
| Total                  | 24.569.906   |

**Table 6.** The list of Twitter hashtags that was used in order to collect 2020 US Election dataset.

| Hashtag                | Tweets count |
|------------------------|--------------|
| #vote                  | 7.196.981    |
| #trump2020             | 3.913.969    |
| #election2020          | 3.535.323    |
| #biden                 | 1.569.981    |
| #debate2020            | 855.543      |
| #votebluetosaveamerica | 837.089      |
| #trumphascovid         | 581.456      |
| #donaldtrump           | 555.251      |
| #2020election          | 370.900      |
| #bluewave2020          | 307.853      |
| #elections2020         | 270.224      |
| #uselection2020        | 229.675      |
| #2020elections         | 190.637      |
| #votetrumpout          | 164.256      |
| #uselection            | 87.827       |
| #elections             | 50.158       |
| #november3rd           | 36.785       |
| #mypresident           | 34.591       |
| #novemberiscoming      | 33.585       |
| #uselections           | 17.691       |
| #getyourassoutandvote  | 2.431        |
| #2020uselection        | 2            |
| Total                  | 20.842.208   |
